# Supplementary material
Source: HighWire-hosted journal article supplement (https://openheart.bmj.com/content/7/2/e001271)
Supplement: inline-supplementary-material-3 [file inline-supplementary-material-3.pdf]

**Supplementary table 3: Patient characteristics, echocardiography and treatment decisions by presence of atrial fibrillation**

|                                                | AF (+)           | AF (-)             | p-value |
|------------------------------------------------|------------------|--------------------|---------|
| Proportion of all patients                     | 316/1,985 (15.9) | 1,669/1,985 (84.1) |         |
| Patient characteristics                        |                  |                    |         |
| Age (years)                                    | 80.4±7.8         | 77.3±10.3          | <0.001  |
| Female gender                                  | 154/316 (48.7)   | 801/1,669 (48.0)   | 0.809   |
| Severe frailty*                                | 23/313 (7.3)     | 76/1,660 (4.6)     | 0.039   |
| ES I (%)                                       | 20.3±15.6        | 14.4±13.2          | <0.001  |
| ES II (%)                                      | 4.7±4.5          | 3.8±4.9            | 0.030   |
| Symptomatic status <sup>†</sup> (%)            | 269/316 (85.1)   | 1,332/1,669 (79.8) | 0.028   |
| Severe symptomatic status <sup>§</sup> (%)     | 190/316 (60.1)   | 840/1,669 (50.3)   | 0.001   |
| Echocardiography                               |                  |                    |         |
| Indexed AVA [cm <sup>2</sup> /m <sup>2</sup> ] | 0.37±0.10        | 0.40±0.11          | <0.001  |
| Mean AV gradient (mmHg)                        | 44.1±15.7        | 48.0±14.1          | <0.001  |
| Mitral regurg grade III/IV                     | 611/311 (19.6)   | 145/1,636 (8.9)    | <0.001  |
| Tricuspid regurg grade III/IV                  | 68/305 (22.3)    | 84/1,582 (5.3)     | <0.001  |
| Indexed LV mass (g/m <sup>2</sup> )            | 135±47           | 133±40             | 0.447   |
| <hr/>                                          |                  |                    |         |
| AVR performed within 3 months                  | 164/272 (57.5)   | 895/1557 (57.5)    | 0.386   |
| Time to intervention (days)                    | 32.3±35.3        | 33.3±34.8          | 0.750   |
| TAVI performed within 3 months                 | 129/272 (47.4)   | 585/1,557 (37.6)   | 0.002   |
| Time to intervention (days)                    | 30.7±35.7        | 29.2±34.2          | 0.645   |
| SAVR performed within 3 months                 | 35/272 (12.9)    | 310/1,557 (19.9)   | 0.006   |
| Time to intervention (days)                    | 38.3±33.4        | 40.7±34.7          | 0.698   |

*Legend:* values are percent or mean ± SD; AV, aortic valve; AVA, aortic valve area; AVR, aortic valve replacement; SAVR, surgical aortic valve replacement; TAVI, transcatheter aortic valve implantation; \*Defined as an inability to walk 5 metres in ≤6 seconds and/or to perform activities of daily living (ADL) [24]. †Defined as chest pain, shortness of breath, and/or dizziness on exertion/syncope. §Defined as CCS class III or IV angina, NYHA class III/IV and/or dizziness on exertion/syncope.
